# Supplementary material for: An interpretable machine learning model for assessing the risk of Talaromycosis in HIV patients lacking skin lesions
Source: Research Square preprint supplement (doi:10.21203/rs.3.rs-7442583/v1), 2025-10-08
Supplement: Supplementary file 1 [file 62fa82576e78a5524726b1cc.pdf]

A

**SVM模型推断马尔尼菲蓝状菌感染**

输入特征值以获得模型的推理结果

|                            |     |
|----------------------------|-----|
| 白蛋白 (g/L)                  | 30  |
| 淋巴细胞绝对值( $\times 10^9/L$ ) | 1.2 |
| 血红蛋白 (g/L)                 | 100 |
| 谷草转氨酶/谷丙转氨酶                | 1   |
| C-反应蛋白(mg/L)               | 35  |
| 谷丙转氨酶(U/L)                 | 35  |
| 白细胞计数( $\times 10^9/L$ )   | 12  |
| 血小板计数 ( $\times 10^9/L$ )  | 90  |
| 浅表或胸腔淋巴结肿大, 0: 无; 1: 有     | 1   |
| CD4+T细胞绝对计数(个/ $\mu L$ )   | 50  |
| 谷草转氨酶(U/L)                 | 35  |
| 年龄/年                       | 50  |

清除数据      提交数据

通过 API 使用    使用 Gradio 构建    Settings

感染风险预测  
预测结果: 有  
可信度: 64.0%

B

**SVM Model Inference**

|             |      |
|-------------|------|
| ALB         | 25   |
| ALC         | 0.25 |
| Hb          | 80   |
| AST/ALT     | 2    |
| CRP         | 80   |
| ALT         | 30   |
| WBC         | 12   |
| PLT         | 75   |
| POAL        | 1    |
| CD4         | 50   |
| AST         | 60   |
| Age (years) | 45   |

清除      Submit

通过 API 使用    使用 Gradio 构建    Settings

Result  
Prediction: 1  
Confidence: 88.0%

**Figure S11. A web-based SVM model was developed for the prediction of talaromycosis**

By entering a participant's clinical variables into the online tool available at <https://modelscope.cn/studios/LRYHJG/rf/summary> for users in China and <https://huggingface.co/spaces/HuJiaGuang/LRYHJG-TM> for international users, the corresponding probability of developing talaromycosis can be calculated. As demonstrated in Figures A and B, the probabilities of talaromycosis development for the two patients in our study were determined to be 0.64 and 0.84, respectively.
