# Supplementary material for: An interpretable machine learning model for assessing the risk of Talaromycosis in HIV patients lacking skin lesions
Source: Research Square preprint supplement (doi:10.21203/rs.3.rs-7442583/v1), 2025-10-08
Supplement: Supplementary file 3 [file fe4383304f2d23c129eb86ca.docx]

**Legends for figures**

**Figure 1. Flow chart for model development and validation**

**Figure 2.The screening process of predictive variables(coefficient distribution)**

In LASSO regression, coefficients shrink as the regularization strength (log Lambda) increases, with non-essential variables nearing zero.

**Figure 3.The screening process of predictive variables(cross-validation)**

The coefficient paths show how predictor shrinkage occurs with increasing regularization strength (log Lambda). The top numbers (33 to 3) indicate retained variables, and coefficients (+1.0 to 8) represent their weights. As regularization strengthens (higher log Lambda), non-essential variables are reduced to zero, allowing for automated feature selection.

**Figure 4. Variable Wayne diagram screened by five methods**

This Venn diagram shows the overlap of features chosen by five feature selection methods: Random Forest, Lasso, Boruta, XGBoost, and Mutual Information. Each section represents features chosen by a specific method, with overlaps indicating features selected by multiple methods. The center highlights 12 features identified by all methods, emphasizing their significance in model building.

**Figure 5. The SVM model's calibration curve was evaluated using the test dataset and external validation**

**A:** Calibration curve of the SVM model evaluated on the test dataset. **B:** Calibration curve of the SVM model assessed during external validation. Calibration curves for the Support Vector Machine (SVM) model (AUC = 0.84) in predicting Talaromyces marneffei infection are presented. The curves for both the test dataset (A) and the external validation cohort (B) demonstrate alignment with the ideal calibration line, thereby confirming the reliability of the predicted probabilities across different cohorts.

**Figure 6. The SVM model's DCA was evaluated using both the test dataset and external validation**

**A:**The DCA of the SVM model was evaluated on the test dataset. **B:**The DCA of the SVM model was assessed during external validation. Decision curve analysis of the SVM model (AUC=0.84) for predicting Talaromyces marneffei infection shows that both the test and external validation datasets yield a higher net benefit than "Treat All" or "Treat None" strategies across threshold probabilities (0.1–0.5 vs. 0.2–1.0), indicating clinical usefulness.

**Figure 7. **Directional SHAP contributions in predicting**Talaromyces marneffei**infection****
**A: Positive drivers**: Elevated AST (101), CRP (96.8), and Hb (99) strongly increase risk (SHAP >0). **B: Negative drivers**: POAL (0) and AST/ALT (2.35) reduce risk (SHAP <0), while ALT (43) and AST (28) show context-dependent effects. SHAP magnitude reflects impact relative to baseline prediction E[f(X)]=0.505*E*[*f*(*X*)]=0.505.

**Legends for Supplementary Figures**

**Supplementary Figure 1. Correlation Heatmap of Feature in the training cohorts**

Color intensity indicates pairwise Pearson coefficients (-1 to +1); red signifies positive and blue negative. Key biomarkers like CRP and AST moderately correlate with infection-related variables such as bacterial pneumonia and cytomegalovirus.

**Supplementary Fig. S2. **Distribution of 36 independent variables in the training cohort****

Scatter plots illustrate the distribution of specific features (e.g., Oral candidiasis, Lymphoma, CRP, and AST) with sample index on the X-axis and normalized values on the Y-axis, showcasing the variability and heterogeneity in clinical biomarkers.

**Supplementary Fig. S3. **Relationship between tree number and error rates in Random Forest model for**Talaromyces marneffei**infection prediction.****As the number of trees increases, the error rates for both the infected (represented in green) and non-infected (represented in blue) groups decrease, eventually converging with the out-of-bag (OOB) error rate (represented in magenta) beyond approximately 150 trees. This convergence suggests a stabilization in model performance.

**Supplementary Fig. S4. List 36 predictive variables in descending order of importance**

**Supplementary Fig. S5. 12 Non-zero predictive variables selected by Lasso regression screening**

LASSO identified key predictors for diagnosing Talaromyces marneffei infection, with twelve features retained as significant clinical biomarkers.

**Supplementary Fig. S6. Feature importance with confidence intervals (Boruta)**

Boruta-selected key biomarkers (e.g., ALT, CRP, Age) for diagnosing Talaromyces marneffei infection are ranked by Random Forest importance scores, with error bars indicating model stability. This ranking highlights statistically significant predictors.

**Supplementary Fig. S7**. **Feature importance ranking**

The evolution of feature importance ranking through Boruta iterations shows initial high variability as the model assesses feature significance (lower ranks indicate higher importance). Later stabilization indicates convergence on key predictors of Talaromyces marneffei infection.

**Supplementary Fig. S8. The variables selected by XGBoost are sorted by importance**

XGBoost-ranked feature importance for predicting Talaromyces marneffei infection highlights key predictors like AST, CRP, and POAL based on their importance scores, showing their contribution to the model. Non-zero weights indicate biomarkers retained after regularization.

**Supplementary Fig. S9. The variables selected by MI are sorted by importance**

Biomarkers ranked by mutual information for predicting Talaromyces marneffei infection show key features like AST, PLT, and ALB, grouped by clinical relevance, such as splenomegaly and bacterial pneumonia, with higher MI scores indicating stronger outcome dependencies.

**Supplementary Fig. S10. Mean absolute SHAP values rank feature importance for predicting Talaromyces marneffei infection**

Key predictors like POAL, AST, and ALC show their magnitude of impact on the model through bar length.

**Supplementary Figure 11. A web-based SVM model was developed to predict talaromycosis**

By entering a participant's clinical variables into the online tool available at https://modelscope.cn/studios/LRYHJG/rf/summary for users in China and https://huggingface.co/spaces/HuJiaGuang/LRYHJG-TM for international users, the corresponding probability of developing talaromycosis can be calculated. As demonstrated in Figures A and B, the probabilities of talaromycosis development for the two patients in our study were determined to be 0.64 and 0.84, respectively.
